# Supplementary material for: Metabolic Disturbances in Rat Sublines with Constitutionally Altered Serotonin Homeostasis
Source: MDPI journal article supplement (doi:10.3390/ijms22105400), 2021-05-20
Supplement: s1 [file s1]

## SUPPLEMENTARY MATERIAL

### Supplementary Figure 1

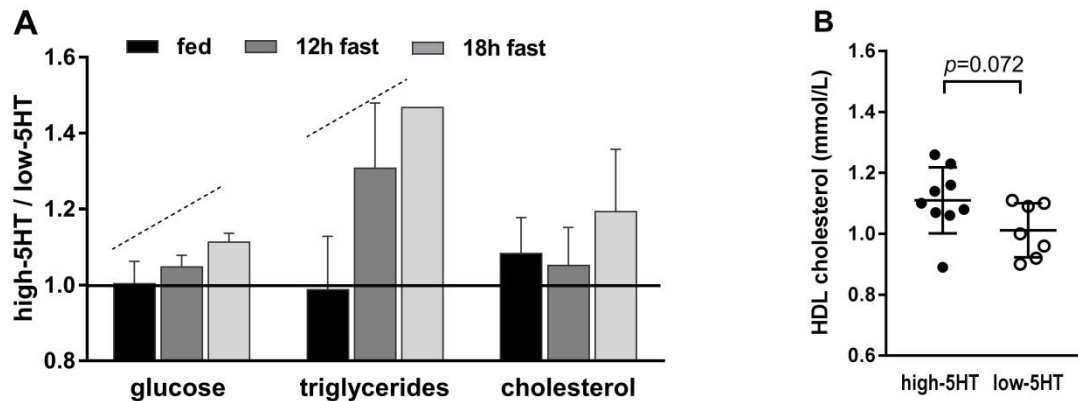

**Figure S1.** (A) Ratio of blood metabolic parameters between high-5HT and low-5HT subline (H/L) in relation to feeding status of animals. Data represent means  $\pm$  SD of 2-4 experiments, each with 6-9 animals per subline (except triglycerides 18h fast). (B) Serum high-density lipoprotein (HDL) cholesterol levels in high-5HT and low-5HT subline (for total cholesterol levels in the same animals see Figure 2 in the main text). Data are given as individual values and mean  $\pm$  SD, with  $p$ -values indicated.

### Supplementary Figure 2

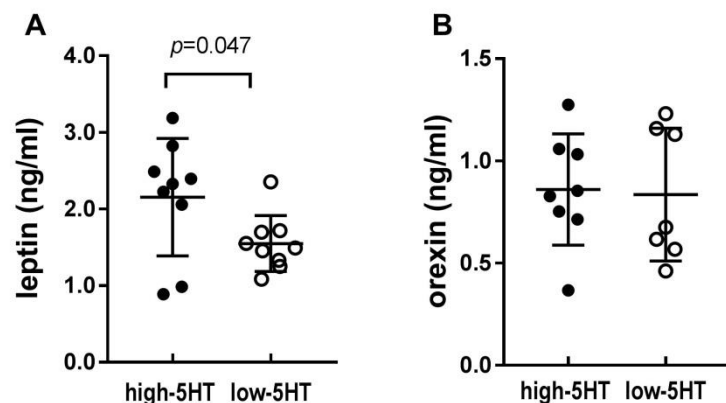

**Figure S2.** Plasma levels of (A) leptin and (B) orexin in male high-5HT and low-5HT rats measured in fed state of the animals. Data are presented as individual values and mean  $\pm$  SD.  $n=7-9$  per group,  $p$ -values are indicated.

### Supplementary Figure 3

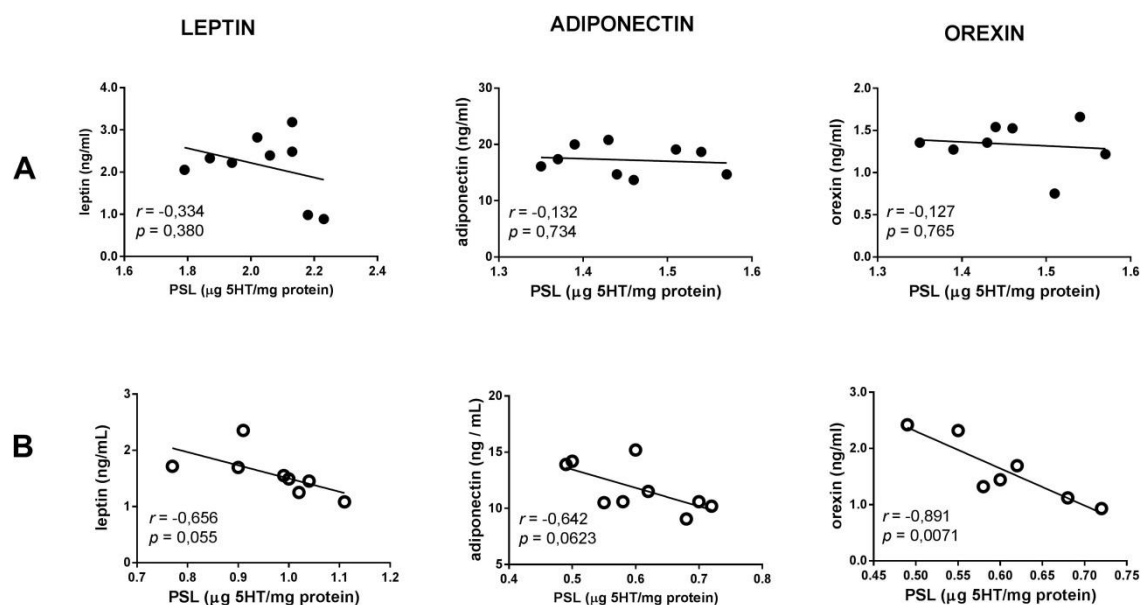

**Figure S3.** Relationship between platelet serotonin level (PSL) and plasma levels of adipokines: leptin (left), adiponectin (middle) and orexin (right) in (A) high-5HT animals and (B) low-5HT animals.  $r$ = correlation coefficient,  $p$ -values are indicated. Negative correlations (significant or trend) were observed only in animals from low-5HT subline.

### Supplementary Figure 4

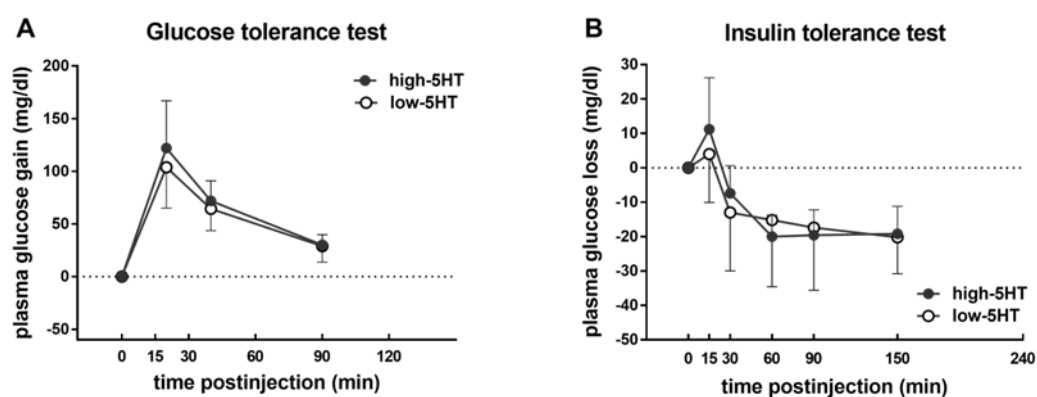

**Figure S4.** (A) Time course of plasma glucose gain following glucose administration to 2-months old animals from high-5HT and low-5HT sublines subjected to overnight fasting. Presented are means  $\pm$  SD in groups of 8-9 animals per subline. (B) Time course of plasma glucose loss following insulin administration in the same groups of animals as above, after 4 hours fasting. Insulin tolerance test was performed 48 hours after glucose tolerance test. No differences in glucose and insulin tolerance were observed between 5HT sublines.

## Supplementary Figure 5

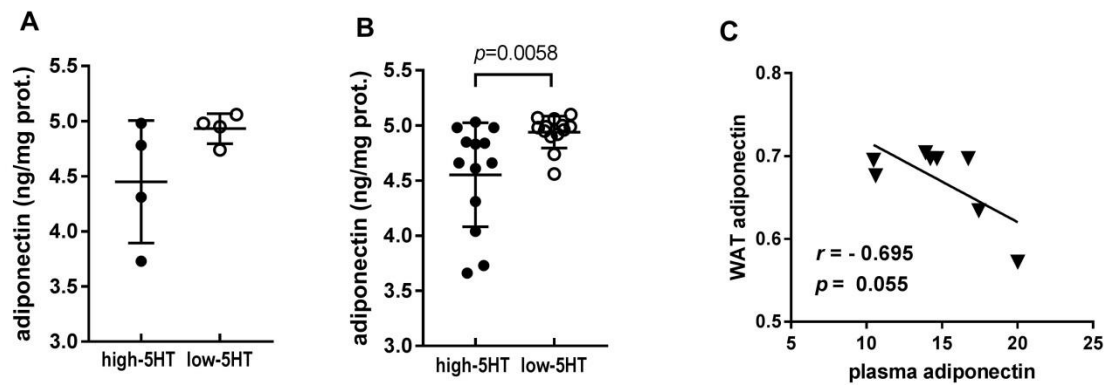

**Figure S5.** (A) Adiponectin concentration in white adipose tissue (WAT) of high-5HT and low-5HT animals aging 9.5 months and (B) pooled values of adiponectin levels measured in animals aged 9.5-months (n, 4 per subline, data from Figure S5A) and 4.5-months (n, 9 per subline, data from Figure 5A in the main text). Data are individual values with indicated mean  $\pm$  SD,  $p$ -values are indicated. (C) Correlation of adiponectin levels in plasma and white adipose tissue (log transformed values). n=4 animals per subline,  $r$ =correlation coefficient.

## Supplementary Table 1

**Table S1.** List of genes analysed in visceral white adipose tissue of animals from WZ-5HT sublines using the Rat Adipogenesis RT<sup>2</sup> Profiler PCR Array. Cq = quantification cycle; RER (H/L) = relative expression ratio (high-5HT/low-5HT subline).

| Symbol of Gene | Description                                                     | Quantification cycle (Cq) |         | RER (H/L) |
|----------------|-----------------------------------------------------------------|---------------------------|---------|-----------|
|                |                                                                 | high-5HT                  | low-5HT |           |
| Acacb          | Acetyl-Coenzyme A carboxylase beta                              | 28.01                     | 28.12   | 0.98      |
| Adipoq         | Adiponectin, C1Q and collagen domain containing                 | 15.98                     | 16.84   | 1.65      |
| Adrb2          | Adrenergic, beta-2-, receptor, surface                          | 26.03                     | 25.71   | 0.73      |
| Agt            | Angiotensinogen (serpin peptidase inhibitor, clade A, member 8) | 22.06                     | 21.72   | 0.72      |
| Angpt2         | Angiopoietin 2                                                  | 25.08                     | 24.89   | 0.80      |
| Axin1          | Axin 1                                                          | 26.50                     | 26.47   | 0.89      |
| Bmp2           | Bone morphogenetic protein 2                                    | 27.20                     | 27.61   | 1.20      |
| Bmp4           | Bone morphogenetic protein 4                                    | 25.13                     | 25.30   | 1.02      |
| Bmp7           | Bone morphogenetic protein 7                                    | 28.65                     | 28.72   | 0.95      |
| Ccnd1          | Cyclin D1                                                       | 25.31                     | 24.88   | 0.67      |
| Cdk4           | Cyclin-dependent kinase 4                                       | 24.36                     | 24.24   | 0.84      |
| Cdkn1a         | Cyclin-dependent kinase inhibitor 1A                            | 25.71                     | 26.06   | 1.16      |
| Cdkn1b         | Cyclin-dependent kinase inhibitor 1B                            | 27.53                     | 27.23   | 0.74      |
| Cebpa          | CCAAT/enhancer binding protein (C/EBP), alpha                   | 23.38                     | 24.03   | 1.42      |
| Cebpb          | CCAAT/enhancer binding protein (C/EBP), beta                    | 21.57                     | 22.10   | 1.31      |
| Cebpd          | CCAAT/enhancer binding protein (C/EBP), delta                   | 26.75                     | 26.19   | 0.61      |
| Cfd            | Complement factor D (adipsin)                                   | 16.42                     | 16.95   | 1.32      |
| Creb1          | CAMP responsive element binding protein 1                       | 25.53                     | 25.41   | 0.84      |
| Ddit3          | DNA-damage inducible transcript 3                               | 23.58                     | 24.15   | 1.35      |
| Dio2           | Deiodinase, iodothyronine, type II                              | 30.55                     | 31.92   | n/a       |
| Dkk1           | Dickkopf homolog 1 ( <i>Xenopus laevis</i> )                    | 35.36                     | 39.41   | n/a       |
| Dlk1           | Delta-like 1 homolog ( <i>Drosophila</i> )                      | 29.56                     | 31.37   | n/a       |
| E2f1           | E2F transcription factor 1                                      | 27.18                     | 27.59   | 1.21      |
| Egr2           | Early growth response 2                                         | 30.18                     | 28.74   | n/a       |
| Fabp4          | Fatty acid binding protein 4, adipocyte                         | 15.13                     | 16.17   | 1.87      |
| Fasn           | Fatty acid synthase                                             | 20.01                     | 20.77   | 1.54      |
| Fgf1           | Fibroblast growth factor 1                                      | 23.60                     | 23.89   | 1.11      |
| Fgf10          | Fibroblast growth factor 10                                     | 26.44                     | 27.08   | 1.41      |
| Fgf2           | Fibroblast growth factor 2                                      | 29.65                     | 29.95   | 1.12      |
| Fos            | FBJ osteosarcoma oncogene                                       | 25.41                     | 25.04   | 0.70      |
| Foxc2          | Forkhead box C2                                                 | 28.19                     | 28.42   | 1.07      |
| Gata2          | GATA binding protein 2                                          | 26.91                     | 27.04   | 0.99      |
| Gata3          | GATA binding protein 3                                          | 28.43                     | 29.18   | 1.52      |
| Hes1           | Hairy and enhancer of split 1 ( <i>Drosophila</i> )             | 24.97                     | 24.93   | 0.88      |
| Insr           | Insulin receptor                                                | 25.19                     | 25.32   | 0.99      |
| Irs1           | Insulin receptor substrate 1                                    | 24.73                     | 24.29   | 0.67      |
| Irs2           | Insulin receptor substrate 2                                    | 24.06                     | 24.45   | 1.19      |
| Jun            | Jun oncogene                                                    | 23.42                     | 23.15   | 0.75      |
| Klf15          | Kruppel-like factor 15                                          | 25.29                     | 25.23   | 0.87      |
| Klf2           | Kruppel-like factor 2 (lung)                                    | 29.90                     | 29.53   | 0.70      |
| Klf3           | Kruppel-like factor 3 (basic)                                   | 23.52                     | 23.55   | 0.92      |
| Klf4           | Kruppel-like factor 4 (gut)                                     | 23.02                     | 22.93   | 0.86      |
| Lep            | Leptin                                                          | 20.40                     | 21.68   | 2.20      |

|          |                                                                            |       |       |      |
|----------|----------------------------------------------------------------------------|-------|-------|------|
| Lipe     | Lipase, hormone sensitive                                                  | 20.38 | 21.16 | 1.55 |
| Lmna     | Lamin A                                                                    | 23.02 | 22.85 | 0.81 |
| Tcf7l2   | Transcription factor 7-like 2 (T-cell specific, HMG-box)                   | 24.29 | 24.27 | 0.90 |
| Lpl      | Lipoprotein lipase                                                         | 18.05 | 18.72 | 1.44 |
| Lrp5     | Low density lipoprotein receptor-related protein 5                         | 25.32 | 25.41 | 0.97 |
| Mapk14   | Mitogen activated protein kinase 14                                        | 25.40 | 25.36 | 0.88 |
| Ncoa2    | Nuclear receptor coactivator 2                                             | 24.77 | 24.87 | 0.97 |
| Ncor1    | Nuclear receptor co-repressor 1                                            | 24.59 | 25.13 | 1.31 |
| Ncor2    | Nuclear receptor co-repressor 2                                            | 27.73 | 27.30 | 0.68 |
| Nr0b2    | Nuclear receptor subfamily 0, group B, member 2                            | 34.12 | 31.15 | n/a  |
| Nr1h3    | Nuclear receptor subfamily 1, group H, member 3                            | 24.07 | 24.30 | 1.07 |
| Nrf1     | Nuclear respiratory factor 1                                               | 27.02 | 26.91 | 0.84 |
| Ppara    | Peroxisome proliferator activated receptor alpha                           | 25.94 | 26.14 | 1.04 |
| Ppard    | Peroxisome proliferator-activated receptor delta                           | 26.22 | 26.29 | 0.95 |
| Pparg    | Peroxisome proliferator-activated receptor gamma                           | 22.36 | 23.15 | 1.57 |
| Ppargc1a | Peroxisome proliferator-activated receptor gamma, coactivator 1 alpha      | 30.11 | 30.86 | n/a  |
| Ppargc1b | Peroxisome proliferator-activated receptor gamma, coactivator 1 beta       | 26.33 | 27.19 | 1.65 |
| Rb1      | Retinoblastoma 1                                                           | 24.73 | 25.25 | 1.30 |
| Retn     | Resistin                                                                   | 19.41 | 20.46 | 1.89 |
| Runx1t1  | Runt-related transcription factor 1; translocated to, 1 (cyclin D-related) | 27.92 | 27.54 | 0.70 |
| Rxra     | Retinoid X receptor alpha                                                  | 23.45 | 23.66 | 1.05 |
| Sfrp1    | Secreted frizzled-related protein 1                                        | 24.16 | 22.91 | 0.38 |
| Sfrp5    | Secreted frizzled-related protein 5                                        | 29.80 | 29.54 | 0.76 |
| Shh      | Sonic hedgehog                                                             | 33.12 | 32.41 | n/a  |
| Sirt1    | Sirtuin (silent mating type information regulation 2 homolog) 1            | 24.79 | 24.57 | 0.78 |
| Sirt2    | Sirtuin (silent mating type information regulation 2 homolog) 2            | 27.32 | 26.91 | 0.68 |
| Sirt3    | Sirtuin (silent mating type information regulation 2 homolog) 3            | 26.66 | 27.02 | 1.17 |
| Slc2a4   | Solute carrier family 2 (facilitated glucose transporter), member 4        | 23.14 | 23.64 | 1.28 |
| Src      | V-src sarcoma (Schmidt-Ruppin A-2) viral oncogene homolog                  | 28.13 | 27.99 | 0.82 |
| Srebf1   | Sterol regulatory element binding transcription factor 1                   | 25.67 | 26.26 | 1.36 |
| Stat5a   | Signal transducer and activator of transcription 5A                        | 26.31 | 26.96 | 1.42 |
| Taz      | Tafazzin                                                                   | 25.72 | 25.97 | 1.07 |
| Tsc22d3  | TSC22 domain family, member 3                                              | 23.49 | 23.30 | 0.80 |
| Twist1   | Twist homolog 1 (Drosophila)                                               | 26.02 | 26.26 | 1.07 |
| Ucp1     | Uncoupling protein 1 (mitochondrial, proton carrier)                       | 34.12 | 36.32 | n/a  |
| Vdr      | Vitamin D (1,25- dihydroxyvitamin D3) receptor                             | 29.41 | 29.77 | 1.16 |
| Wnt1     | Wingless-type MMTV integration site family, member 1                       | 32.20 | 33.02 | n/a  |
| Wnt10b   | Wingless-type MMTV integration site family, member 10B                     | 29.17 | 29.93 | 1.55 |
| Wnt3a    | Wingless-type MMTV integration site family, member 3A                      | 29.20 | 30.29 | n/a  |
| Wnt5a    | Wingless-type MMTV integration site family, member 5A                      | 25.62 | 25.47 | 0.82 |
| Wnt5b    | Wingless-type MMTV integration site family, member 5B                      | 27.86 | 27.64 | 0.78 |
| Rplp1    | Ribosomal protein, large, P1                                               | 18.26 | 18.30 | n/a  |
| Hprt1    | Hypoxanthine phosphoribosyltransferase 1                                   | 24.08 | 24.20 | n/a  |
| Rpl13a   | Ribosomal protein L13A                                                     | 20.07 | 20.07 | n/a  |
| Ldha     | Lactate dehydrogenase A                                                    | 21.78 | 22.36 | n/a  |
| Actb     | Actin, beta                                                                | 19.10 | 19.08 | n/a  |

## Supplementary Table 2

**Table S2.** List of genes analysed in visceral white adipose tissue of animals from WZ-5HT sublines using the Rat Obesity RT<sup>2</sup> Profiler PCR Array. Cq = quantification cycle, RER(H/L) = relative expression ratio (high-5HT/low-5HT subline).

| Symbol of Gene | Description                                           | Quantification cycle (Cq) |         | RER (H/L) |
|----------------|-------------------------------------------------------|---------------------------|---------|-----------|
|                |                                                       | high-5HT                  | low-5HT |           |
| Adcyap1        | Adenylate cyclase activating polypeptide 1            | 33.61                     | 33.69   | n/a       |
| Adcyap1r1      | Adenylate cyclase activating polypeptide 1 receptor 1 | 27.72                     | 27.58   | 0.84      |
| Adipoq         | Adiponectin, C1Q and collagen domain containing       | 16.05                     | 16.78   | 1.53      |
| Adipor1        | Adiponectin receptor 1                                | 23.15                     | 23.73   | 1.39      |
| Adipor2        | Adiponectin receptor 2                                | 24.04                     | 24.74   | 1.51      |
| Adra2b         | Adrenergic, alpha-2B-, receptor                       | 31.91                     | 32.43   | n/a       |
| Adrb1          | Adrenergic, beta-1-, receptor                         | 26.58                     | 27.85   | 2.24      |
| Agrp           | Agouti related protein homolog (mouse)                | 30.37                     | 31.01   | n/a       |
| Apoa4          | Apolipoprotein A-IV                                   | 36.23                     | 26.59   | n/a       |
| Atrn           | Attractin                                             | 26.24                     | 26.65   | 1.24      |
| Bdnf           | Brain-derived neurotrophic factor                     | n.d.                      | 33.41   | n/a       |
| Brs3           | Bombesin-like receptor 3                              | n.d.                      | n.d.    | n/a       |
| C3             | Complement component 3                                | 31.34                     | 24.39   | n/a       |
| Calca          | Calcitonin-related polypeptide alpha                  | 30.01                     | 31.11   | n/a       |
| Calcr          | Calcitonin receptor                                   | 33.24                     | 34.02   | n/a       |
| Cartpt         | CART prepropeptide                                    | 36.27                     | 35.72   | n/a       |
| Cck            | Cholecystokinin                                       | 35.88                     | 33.65   | n/a       |
| Cckar          | Cholecystokinin A receptor                            | 33.51                     | 34.47   | n/a       |
| Clps           | Colipase, pancreatic                                  | 32.24                     | 35.23   | n/a       |
| Cnr1           | Cannabinoid receptor 1 (brain)                        | 30.51                     | 31.91   | n/a       |
| Cntf           | Ciliary neurotrophic factor                           | 26.74                     | 28.16   | 2.48      |
| Cntfr          | Ciliary neurotrophic factor receptor                  | 29.00                     | 28.22   | 0.54      |
| Crh            | Corticotropin releasing hormone                       | n.d.                      | n.d.    | n/a       |
| Crhr1          | Corticotropin releasing hormone receptor 1            | n.d.                      | n.d.    | n/a       |
| Drd1a          | Dopamine receptor D1A                                 | 33.08                     | 33.94   | n/a       |
| Drd2           | Dopamine receptor D2                                  | 33.79                     | 33.00   | n/a       |
| Gal            | Galanin prepropeptide                                 | 32.35                     | 31.56   | n/a       |
| Galr1          | Galanin receptor 1                                    | 31.74                     | 31.55   | n/a       |
| Gcg            | Glucagon                                              | n.d.                      | 32.32   | n/a       |
| Gcgr           | Glucagon receptor                                     | 31.33                     | 28.58   | n/a       |
| Gh1            | Growth hormone 1                                      | 37.85                     | 33.53   | n/a       |
| Ghr            | Growth hormone receptor                               | 21.10                     | 22.04   | 1.78      |
| Ghrl           | Ghrelin/obestatin prepropeptide                       | 29.58                     | 29.71   | 1.02      |
| Ghsr           | Growth hormone secretagogue receptor                  | 34.96                     | 33.79   | n/a       |
| Glp1r          | Glucagon-like peptide 1 receptor                      | 34.67                     | 36.23   | n/a       |
| Prlhr          | Prolactin releasing hormone receptor                  | n.d.                      | n.d.    | n/a       |
| Mchr1          | Melanin-concentrating hormone receptor 1              | 33.12                     | 32.05   | n/a       |
| Grp            | Gastrin releasing peptide                             | n.d.                      | 37.98   | n/a       |
| Grpr           | Gastrin releasing peptide receptor                    | 37.47                     | 34.78   | n/a       |
| HcRt           | Hypocretin                                            | 35.60                     | n.d.    | n/a       |
| Hcrtr1         | Hypocretin (orexin) receptor 1                        | 32.97                     | 32.02   | n/a       |
| Hrh1           | Histamine receptor H 1                                | 30.87                     | 30.52   | n/a       |

|          |                                                                       |       |       |      |
|----------|-----------------------------------------------------------------------|-------|-------|------|
| Htr2c    | 5-hydroxytryptamine (serotonin) receptor 2C                           | 32.43 | 32.16 | n/a  |
| Iapp     | Islet amyloid polypeptide                                             | n.d.  | 34.49 | n/a  |
| Il1a     | Interleukin 1 alpha                                                   | n.d.  | 30.82 | n/a  |
| Il1b     | Interleukin 1 beta                                                    | 30.50 | 28.65 | n/a  |
| Il1r1    | Interleukin 1 receptor, type I                                        | 26.56 | 25.68 | 0.51 |
| Il6      | Interleukin 6                                                         | 33.42 | 32.24 | n/a  |
| Il6r     | Interleukin 6 receptor                                                | 25.80 | 25.04 | 0.55 |
| Ins1     | Insulin 1                                                             | 35.44 | 34.03 | n/a  |
| Ins2     | Insulin 2                                                             | 31.72 | 33.97 | n/a  |
| Insr     | Insulin receptor                                                      | 25.14 | 25.51 | 1.20 |
| Lep      | Leptin                                                                | 20.69 | 22.22 | 2.69 |
| Lepr     | Leptin receptor                                                       | 31.72 | 31.30 | n/a  |
| Mc3r     | Melanocortin 3 receptor                                               | 38.62 | n.d.  | n/a  |
| Nmb      | Neuromedin B                                                          | 27.75 | 27.68 | 0.89 |
| Nmbr     | Neuromedin B receptor                                                 | 33.14 | 32.04 | n/a  |
| Nmu      | Neuromedin U                                                          | 34.07 | 32.32 | n/a  |
| Nmur1    | Neuromedin U receptor 1                                               | 29.40 | 29.00 | 0.70 |
| Npy      | Neuropeptide Y                                                        | 27.33 | 27.15 | 0.82 |
| Npy1r    | Neuropeptide Y receptor Y1                                            | 26.84 | 26.60 | 0.78 |
| Nr3c1    | Nuclear receptor subfamily 3, group C, member 1                       | 23.72 | 24.15 | 1.25 |
| Ntrk1    | Neurotrophic tyrosine kinase, receptor, type 1                        | 36.78 | 38.09 | n/a  |
| Nts      | Neurotensin                                                           | 34.02 | n.d.  | n/a  |
| Ntsr1    | Neurotensin receptor 1                                                | 28.98 | 28.33 | 0.59 |
| Oprk1    | Opioid receptor, kappa 1                                              | 36.26 | 33.38 | n/a  |
| Oprm1    | Opioid receptor, mu 1                                                 | 34.56 | 33.32 | n/a  |
| Sigmar1  | Sigma non-opioid intracellular receptor 1                             | 24.57 | 24.41 | 0.83 |
| Pomc     | Proopiomelanocortin                                                   | 26.54 | 27.34 | 1.61 |
| Ppara    | Peroxisome proliferator activated receptor alpha                      | 26.57 | 27.02 | 1.26 |
| Pparg    | Peroxisome proliferator-activated receptor gamma                      | 22.76 | 23.52 | 1.57 |
| Ppargc1a | Peroxisome proliferator-activated receptor gamma, coactivator 1 alpha | 30.67 | 31.50 | n/a  |
| Ptpn1    | Protein tyrosine phosphatase, non-receptor type 1                     | 26.13 | 26.33 | 1.06 |
| Pyy      | Peptide YY (mapped)                                                   | 35.58 | 34.08 | n/a  |
| Ramp3    | Receptor (G protein-coupled) activity modifying protein 3             | 29.67 | 28.39 | 0.38 |
| Sort1    | Sortilin 1                                                            | 23.01 | 23.78 | 1.57 |
| Sst      | Somatostatin                                                          | 35.09 | 36.08 | n/a  |
| Sstr1    | Somatostatin receptor 1                                               | 32.16 | 32.85 | n/a  |
| Thrb     | Thyroid hormone receptor beta                                         | 25.05 | 25.62 | 1.38 |
| Tnf      | Tumor necrosis factor (TNF superfamily, member 2)                     | 30.78 | 31.23 | n/a  |
| Trh      | Thyrotropin releasing hormone                                         | n.d.  | 32.93 | n/a  |
| Trhr     | Thyrotropin releasing hormone receptor                                | 35.26 | 35.05 | n/a  |
| Ucn      | Urocortin                                                             | 39.48 | 36.11 | n/a  |
| Ucp1     | Uncoupling protein 1 (mitochondrial, proton carrier)                  | 34.84 | 35.73 | n/a  |
| Rplp1    | Ribosomal protein, large, P1                                          | 18.02 | 17.92 | n/a  |
| Hprt1    | Hypoxanthine phosphoribosyltransferase 1                              | 23.39 | 23.34 | n/a  |
| Rpl13a   | Ribosomal protein L13A                                                | 19.87 | 19.84 | n/a  |
| Ldha     | Lactate dehydrogenase A                                               | 21.36 | 22.03 | n/a  |
| Actb     | Actin, beta                                                           | 18.48 | 18.53 | n/a  |

## Supplementary Table 3

**Table S3.** Primer sequences used in RT-qPCR analysis

| NCBI symbol     | Gene                                                                   | Forward primer sequence     | Reverse primer sequence     |
|-----------------|------------------------------------------------------------------------|-----------------------------|-----------------------------|
| <i>Actb</i>     | Actin beta                                                             | 5'-GCGCAAGTACTCTGTGTGGA     | 5'-ACATCTGCTGGAAGGTGGAC     |
| <i>Adipoq</i>   | Adiponectin                                                            | 5'-GAGACGCAGGTGTTCTTG       | 5'-CCTACGCTGAATGCTGAG       |
| <i>Adipor1</i>  | Adiponectin receptor 1                                                 | 5'-GCTGGCCTTTATGCTGCTCG     | 5'-TCTAGGCCGTAACGGAATTC     |
| <i>Adipor2</i>  | Adiponectin receptor 2                                                 | 5'-TCTAG CCGTAACGGAATTC     | 5'-GATACTGAGGGGTGGCAAAC     |
| <i>Atgl</i>     | Adipose triglyceride lipase                                            | 5'-AGACTGTCTGAGCAGGTGGA     | 5'-AGTAGCTGACGCTGGCATTTC    |
| <i>Cebpa</i>    | CCAAT enhancer binding protein alpha                                   | 5'-GACCATCCGCCTTGTTGTGTA    | 5'-CTGACATTGCACAAGGCACC     |
| <i>Cebpb</i>    | CCAAT/enhancer binding protein beta                                    | 5'-GACAAGCTGAGCGACGAGTA     | 5'-AGCTGCTCCACCTTCTTCTG     |
| <i>Cebpd</i>    | CCAAT/enhancer binding protein delta                                   | 5'-GAATTGCTACAGTTTCTTGG     | 5'-ATGCGCAGTCTCTTCCTC       |
| <i>Cfd</i>      | Complement factor D                                                    | 5'-CCTACATGGCTTCAGTGCAA     | 5'-TTCAGGACTGGACAGGGAGT     |
| <i>Fabp4</i>    | Fatty acid binding protein 4                                           | 5'-AGAAGTGGGAGTTGGCTTCG     | 5'-ACTCTCTGACCGGATGACGA     |
| <i>Fasn</i>     | Fatty acid synthase                                                    | 5'-GGTAGGCTTGGTGAAGTGTCTC   | 5'-TCTAACTGGAAGTGACGGAAGG   |
| <i>Fgf2</i>     | Fibroblast growth factor 2                                             | 5'-TTCACAGCCTGTGCTCTAGGG    | 5'-GATCGGGTCAGGTTTTGGAAA    |
| <i>Fgf10</i>    | Fibroblast growth factor 10                                            | 5'-GAGATGTCCGCTGGAGAAAG     | 5'-CCCCTTCTTGTTCATGGCTA     |
| <i>Fgf21</i>    | Fibroblast growth factor 21                                            | 5'-AGGCTTTGACACCCAGGATT     | 5'-ACAGATGACGACCAGGACAC     |
| <i>Gapdh</i>    | Glyceraldehyde-3-phosphate dehydrogenase                               | 5'-TGCCCCCATGTTTGTGATG      | 5'-TGGTGGTGCAGGATGCATT      |
| <i>Glut1</i>    | Glucose transporter 1                                                  | 5'-TGGCCAAGGACACACGAATACTGA | 5'-TGGAAGAGACAGGAATGGGCGAAT |
| <i>Glut4</i>    | Glucose transporter 4                                                  | 5'-ATCAACGCCCCACAGAAAGT     | 5'-CCTGCCTACCCAGCCAAGT      |
| <i>Hsl</i>      | Hormone-sensitive lipase                                               | 5'-CTCCTCATGGCTCAACTCC      | 5'-ACTCCTGCGCATAGACTCC      |
| <i>Insr</i>     | Insulin receptor                                                       | 5'-ATCTCCTGGGATTCATGCTG     | 5'-TACTGGGTCCAGGGTTTGAG     |
| <i>Irs1</i>     | Insulin receptor substrate 1                                           | 5'-GATTTAAGCACCTATGCCAG     | 5'-GAATCGTGAAAGAGTTTCGAG    |
| <i>Irs2</i>     | Insulin receptor substrate 2                                           | 5'-CCACACACCTGTCCTCATTG     | 5'-TAATCCGCTTTGCCAAAATC     |
| <i>Lep</i>      | Leptin                                                                 | 5'-GAC ACC AAA ACC CTC AT   | 5'-CAG GGT CTG GTC CAT CT   |
| <i>Lpl</i>      | Lipoprotein lipase                                                     | 5'-TTGAGAAAGGGCTCTGCCTGAGTT | 5'-TGCTTCTCTTGGCTCTGACCTTGT |
| <i>Pparg</i>    | Peroxisome proliferator activated receptor gamma                       | 5'-TCGCTGATGCACTGCCTATG     | 5'-TGATTCCGAAGTTGGTGGGC     |
| <i>Ppargc1b</i> | Peroxisome proliferative activated receptor, gamma, coactivator 1 beta | 5'-CTACCAGAGCCCCACCCAGTA    | 5'-CAGGATGAGGAGCCAGAAGT     |
| <i>Retn</i>     | Resistin                                                               | 5'-ACT TCA GCT CCC TAC TG   | 5'-GTC TAT GCT TCC GCA CT   |
| <i>Tnf</i>      | Tumor necrosis factor                                                  | 5'-CATCTTCTCAAACTCGAGTGACAA | 5'-TGGGAGTAGATAAGGTACAGCCC  |
| <i>Vegfa</i>    | Vascular endothelial growth factor A                                   | 5'-CCGGTTTAAATCCTGGAGCG     | 5'-TTTAACTCAAGCTGCCTCGC     |
